1 Effects of anesthetic tricaine on stress and reproductive aspects of South American  
2 silver catfish (*Rhamdia quelen*) male

3 Short title: Effects of anesthetic tricaine on stress and reproductive aspects of South  
4 American Silver Catfish

5

6 Nathalia dos Santos Teixeira<sup>1\*</sup>¶, Lis Santos Marques<sup>1</sup>¶, Rômulo Batista  
7 Rodrigues<sup>1</sup>¶, Darlan Gusso<sup>2</sup>, Ana Amélia Nunes Fossati<sup>1</sup>, Danilo Pedro Streit Jr.<sup>1</sup>

8 <sup>1</sup>Animal Science Research Program of Federal University of Rio Grande do Sul,  
9 Porto Alegre, RS, Brazil.

10 <sup>2</sup> Postgraduate Program in Cellular and Molecular Biology, Neurochemistry and  
11 Psychopharmacology Laboratory, School of Sciences, Pontifical Catholic University of  
12 Rio Grande do Sul, Porto Alegre, RS, Brazil.

13

14 \* Corresponding author

15 Email: [nathalia.teixeira@ufrgs.br](mailto:nathalia.teixeira@ufrgs.br) (NST)

16 ¶These authors contributed equally to this work.

## 17 **Abstract**

18 Anesthesia is a common practice used in fish research and aquaculture. For both  
19 applications, it is important to understand anesthetics effects on the animal and tissues of  
20 interest to ensure the validity of data and to improve animal welfare. Captive fish  
21 production is only possible with artificial reproduction, and it is known that manipulation  
22 is a stressor stimulus in fish. The most common method of determining fish stress  
23 responses is measuring the circulating level of cortisol. Therefore, the purpose of this  
24 study was to evaluate the effects of different concentrations (100, 200, and 300 mg L<sup>-1</sup>)  
25 of the anesthetic tricaine methanesulfonate (MS-222) on cortisol levels and their  
26 influence on the sperm quality maintenance in *Rhamdia quelen*. After hormonal  
27 induction, 28 sexually mature males (average weight = 363.00 ± 71.24 g) were randomly  
28 distributed among treatments, and their semen and blood samples were collected.  
29 Anesthesia induction time, motility rate, sperm concentration and morphology, plasma  
30 cortisol levels, and reproductive hormones concentrations (testosterone, 17- $\alpha$ -  
31 hydroxyprogesterone, and estradiol) were evaluated. Anesthesia with 100 mg L<sup>-1</sup> MS-222  
32 presented a longer induction time than that with 200 and 300 mg L<sup>-1</sup> MS-222. Sperm  
33 motility rate was significantly higher in the control than in the 300 mg L<sup>-1</sup> treatment but  
34 did not differ among the control, 100, and 200 mg L<sup>-1</sup> treatments. Estradiol level was  
35 significantly higher in non-anesthetized than in anesthetized fish, but plasma cortisol  
36 levels did not differ significantly between treatments (182.50 ± 42.03 ng mL<sup>-1</sup>). MS-222  
37 anesthetizes fish by blocking the sodium channels, preventing the development of nerve  
38 action potentials. However, MS222 at concentrations of 100, 200, and 300 mg L<sup>-1</sup> did not  
39 prevent stress in South American silver catfish males. In addition, its use did not maintain  
40 sperm quality, as it impaired motility and decreased levels of plasma estradiol.

41

## 42 **1. Introduction**

43           Stressors trigger a cascade of endocrine changes responsible for the stress  
44 response that can be divided into three main phases. The primary response is related to  
45 changes in the activity of neurotransmitters that lead to increased circulating levels of  
46 catecholamines and corticosteroids, mainly cortisol [1]. With the increase of these  
47 hormones in the circulatory system, several subsequent effects can be observed at blood  
48 and tissue levels, setting the secondary response. These changes include increase in  
49 circulating glucose and lactate levels, development of osmoregulatory disorders, and  
50 hematological and immunological changes [1, 2]. The persistence of these stressors,  
51 characterizing the tertiary response, may induce a significant impairment of well-being,  
52 negatively influencing physiological aspects such as immunity [3], behavior, and  
53 reproduction [2] in fish [4] and other species [5, 6, 7].

54           Animal reproduction is regulated by a complex interaction of various hormones  
55 that can be individually or collectively modulated by environmental and management  
56 factors [8, 9]. Thus, depending on the moment of the life cycle, severity, and stress  
57 duration, stress may affect reproduction [10]. The biological consequences of  
58 reproductive stress can be expressed by changes in both the reproductive behavior and  
59 the quantity and quality of the gametes [11], since they depend on an adequate hormonal  
60 environment during their development [12]. Thus, the importance of care in fish  
61 management should be taken into account, considering the health of the animals, the  
62 environmental sustainability of the aquaculture systems, and the profitability of the  
63 activity, since care is crucial to determine the survival success of the offspring in a  
64 production system.

65           Understanding the effects of stressful events at the population and individual level  
66 is indispensable for conservation biology, management of wild populations, and

67 aquaculture [13]. Thus, one way to improve fish management is to minimize stress,  
68 preserving well-being. To achieve this goal, the use of anesthetics and/or sedatives has  
69 been suggested in fish farms [14].

70 Tricaine methanesulfonate (MS-222; ethyl 3-amino benzoate methanesulfonate),  
71 is currently the most commonly used drug in anesthesia, sedation, and euthanasia by  
72 immersion baths [15]. This is the only drug approved by the Food and Drug  
73 Administration (FDA) for use within fish for consumption in the US, although it is  
74 mandatory to wait at least 21 days for human consumption [2]. For fish anesthesia, the  
75 indicated concentration has a large variation among species that may vary from 50–400  
76 mg L<sup>-1</sup> of MS-222 [16].

77 To achieve satisfactory anesthesia and recovery in juveniles of South American  
78 silver catfish *Rhamdia quelen*, the indicated dose of MS-222 is 300 mg L<sup>-1</sup> [17]. However,  
79 to date, no study has evaluated the effects of MS-222 anesthesia on seminal quality and  
80 reproductive hormonal profile of *R. quelen* males during reproductive management.

81 Thus, the objective of this study was to evaluate the effects of different MS-222  
82 anesthetic concentrations (100, 200, and 300 mg L<sup>-1</sup>) on sexual steroids hormonal profile,  
83 sperm quality, and stress response (i.e., cortisol levels and differential leukocyte count)  
84 of *R. quelen* males during reproductive management.

85

## 86 **2. Materials and methods**

### 87 **2.1. Fish maintenance and experimental conditions**

88 Experimental protocols were performed according to Ethics and Animal Welfare  
89 Committee of the Federal University of Rio Grande do Sul (project number: 35840).

90 Two-year-old silver catfish (28 fish;  $363.00 \pm 71.24$  g) were acclimated in seven  
91 plastic tanks (500 L) with a black background and a constant flow of aerated water for  
92 four weeks before the experiment, which was carried out during the summer. Fish were  
93 fed twice a day (8 h and 16 h) with a commercial diet (32 % crude protein, Acqua Fish,  
94 Supra<sup>®</sup>, Alisul, Brazil) until apparent satiety. Experimental parameters were as follows:  
95 water temperature,  $27 \pm 0.5$  °C; pH,  $6.8 \pm 0.2$ ; dissolved oxygen,  $5.5 \pm 0.5$  mg L<sup>-1</sup>, and  
96 natural photoperiod.

## 97 **2.2. Experimental design**

98 The treatments consisted of increasing concentrations of MS-222 (Sigma-Aldrich,  
99 EUA, CAS Number: 886-86-2) for fish anesthesia (100, 200, and 300 mg L<sup>-1</sup>) and the  
100 control treatment where the animals were not anesthetized, including four treatments with  
101 seven replicates (each individual animal being considered as a repetition). The control  
102 group was exposed to anesthetic-free water and the duration time calculated from the  
103 mean of the other treatments.

## 104 **2.3. Hormonal induction**

105 Hormone induction was performed with intracavitary application of carp pituitary  
106 extract at the concentration of 3 mg kg<sup>-1</sup> (pituitary / fish weight) using insulin syringe  
107 (1 mL) and a 13 × 0.45 mm needle. After 240 hours-degree, the fish were placed in tanks  
108 with 10 L of water containing the different anesthetic concentrations of each treatment.

## 109 **2.4. Anesthetic baths**

110 The anesthetic baths were performed individually for each fish prior to the  
111 collection of semen. Each fish was carefully removed from the maintenance tank and  
112 placed inside the vessel containing the anesthetic concentration to be tested. Anesthesia

113 induction solutions were replaced with new ones after sedation of 14 animals ensuring  
114 that all fish were exposed to the correct concentrations of anesthetic. Anesthesia induction  
115 was observed according to the characteristics of fish anesthesia stages (Table 1) [18], with  
116 the objective of reaching the stage of deep anesthesia (IV), in which the animal loses the  
117 muscle tone as well as the balance, presenting a slow but regular opercular movement.  
118 The anesthesia induction time was monitored through a digital timer, quantifying the time  
119 each fish was immersed within the solution until the total loss of its movement and  
120 considerable decrease of the opercular movement.

121

122 Table 1. Stages of fish anesthesia

| Stage | Description         | Behavioral Response in Pisces                                                                                                           |
|-------|---------------------|-----------------------------------------------------------------------------------------------------------------------------------------|
| 0     | Normal              | Reactive to external stimuli; normal opercular movements; normal muscle reaction.                                                       |
| I     | Light Sedation      | Reactive to external stimuli; reduced movements; slower opercular movements; normal balance.                                            |
| II    | Deep Sedation       | Total loss of reactivity to external stimuli except strong pressure; slight decrease in opercular movement; normal balance.             |
| III   | Narcosis            | Partial loss of muscle tone; erratic swimming; increased opercular movements; reactive only to strong tactile stimulation or vibration. |
| IV    | Deep Anesthesia     | Total loss of muscle tone; total loss of balance; slow but regular opercular movements.                                                 |
| V     | Surgical Anesthesia | Total absence of reaction, even to strong stimulus; slow and irregular opercular movements; slow heartbeat; loss of all reflexes.       |
| VI    | Medullary collapse  | Stop in ventilation; cardiac arrest; death.                                                                                             |

123

## 124 **2.5. Semen quality collection and evaluation**

125 For the collection of semen an anteroposterior massage was applied in the  
126 abdominal region with the fish slightly inclined with the head upwards, collecting the

127 semen with the help of a 5 mL syringe. During collection, the first drop of semen was  
128 discarded and possible contamination with feces, blood, or urine was avoided.

### 129 **2.5.1. Membrane morphology, motility, and integrity analysis**

130 For the evaluation of sperm morphology, samples were fixed in 10 % buffered  
131 formalin solution at 1:1000 dilution. The samples were subjected to the Rose Bengal  
132 staining (4 %) and analyzed under a light microscope (100×), with a total of 200  
133 spermatozoa per smear. The percentage of normal and non-normal spermatozoa was  
134 measured, as well as the percentage of sperm abnormalities, i.e., primary pathologies  
135 (macrocephaly, microcephaly, head degenerations, fractured tail, strongly curled tail,  
136 simple bent tail) and secondary pathologies (free normal head, proximal droplet, distal  
137 droplet, coiled tail distal) [19].

138 For the evaluation of sperm motility, the semen was diluted and activated in  
139 58 mM NaCl solution in a ratio of 2:20  $\mu$ L, then a volume of 2  $\mu$ L of this solution was  
140 placed on a histological slide for evaluation under an optical microscope (40×). Sperm  
141 motility rate was estimated in percentage. The percentage of cells with an intact  
142 membrane was evaluated using the eosin-nigrosin dyes. Semen was diluted (1:100) in  
143 Ginsburg Fish Ringer's solution (sodium chloride - NaCl 6.50 g, potassium chloride - KCl  
144 0.250 g, calcium chloride dihydrate -  $\text{CaCl}_2 (\text{H}_2\text{O})_2$   $\text{NaHCO}_3$  0.20 g in 1000 mL of  
145 distilled water, pH 7.5, 300 mOsm) [20]. Subsequently, 20  $\mu$ L of this dilution was mixed  
146 with 20  $\mu$ L of the dye for a smear on histological slide and evaluation of 200 spermatozoa  
147 per slide. Sperm that had a non-stained head were considered intact and spermatozoa with  
148 a stained head were considered non-intact.

## 149 **2.6. Collection and evaluation of blood parameters**

### 150 **2.6.1. Blood collection**

151 With the animal still anesthetized, the blood was collected with a 3 mL syringe  
152 and a 25 × 0.7 mm needle inserted into the ventral region, caudal to the genital region, at  
153 an angle of 45–90 ° towards the ventral region of the spinal cord to allow the puncture of  
154 the caudal vein. A maximum of 3 mL were collected from each animal.

### 155 **2.6.2. Measurement of hormone levels and leukocyte differential**

156 Blood samples were transferred to microtubes (Microvette® 500 µL, serum gel  
157 with clot activator, Sarstedt, Deutschland) for plasma separation. Cortisol levels and  
158 hormonal profile of sex steroids were determined by enzyme-linked immunosorbent  
159 assay (ELISA) according to the manufacturer's instructions (17-β-estradiol, Testosterone,  
160 EIA Kit SYMBIOSIS DIAGNOSTIC LTDA, Brazil; 17-α-hydroxyprogesterone,  
161 Cortisol, EIA DBC Kit, Canada).

162 A blood smear was performed with 0.2 mL of each blood sample in order to  
163 determine the influence of the anesthetic on the defense cells [11]. The differential  
164 leukocyte count was performed according to literature [21].

### 165 **2.7. Statistical analysis**

166 The normality and homogeneity of the data were verified by the Shapiro-Wilk test  
167 and the Levene test, respectively. After verification of compliance with the statistical  
168 assumptions, data were analyzed by one-way ANOVA, followed by the Tukey averages  
169 comparison test, at 5 % significance level. Data that did not present normal distribution  
170 were analyzed by Kruskal-Wallis analysis, followed by Dunn's test, at 5 % significance  
171 level. The data of variables presenting significant differences between treatments were  
172 subjected to regression analysis, and those that showed a significant coefficient were  
173 presented. Pearson's correlation analysis was applied to verify the relationship between



174 the variables analyzed. Statistical Analysis System 9.4 and GraphPad Prism 7.0 software  
175 was used to aid in statistical analysis and graphing.

176

### 177 **3. Results**

178 A significant difference ( $p = 0.0145$ ) was observed for anesthesia induction time  
179 (s) among anesthetized fish with increasing concentrations of MS-222 (Fig 1). Animals  
180 anesthetized with 100 mg L<sup>-1</sup> MS-222 presented the longest anesthesia induction time  
181 ( $440.14 \pm 51.32$  seconds), differing from fish anesthetized with 200 and 300 mg L<sup>-1</sup>,  
182 which presented anesthesia induction times of  $283.43 \pm 46.35$  and  $243, 38 \pm 29.54$  s,  
183 respectively.

184

185 **Fig 1. Anesthetic induction (seconds) of *R. quelen* anesthetized with increasing**  
186 **concentrations of tricaine (MS-222).**  
187 Different letters indicate significant difference by the Tukey test ( $p < 0.05$ ). Data expressed  
188 as Mean $\pm$ SEM.

189

190 Fish from the control group had the highest estradiol concentration ( $118.90 \pm$   
191  $21.22$  ng mL<sup>-1</sup>), which was statistically different from that of those anesthetized with 100  
192 ( $62.43 \pm 10.92$  ng mL<sup>-1</sup>), 200 ( $54.71 \pm 7.55$  ng mL<sup>-1</sup>) and 300 mg L<sup>-1</sup> tricaine ( $61.75 \pm$   
193  $11.78$  ng mL<sup>-1</sup>) (Fig 2A). No significant difference was observed among treatments for  
194 cortisol levels ( $p = 0.3394$ ), testosterone ( $p = 0.3100$ ) and 17- $\alpha$ -hydroxyprogesterone  
195 levels ( $p = 0.7176$ ) (Fig 2B).

196

197 **Fig 2. Hormone levels of *R. quelen* anesthetized with increasing concentrations of**  
198 **tricaine (MS-222).**

199 A: Cortisol (ng/mL); B: Testosterone (ng/mL); C: Estradiol (ng/mL); D: 17- $\alpha$ -  
200 Hydroxyprogesterone (ng/mL). Different letters indicate significant difference by the  
201 Tukey test ( $p < 0.05$ ). Data expressed as Mean $\pm$ SEM.

202

203 No significant difference was observed among treatments in percent of  
204 lymphocytes ( $p = 0.5080$ ), neutrophils ( $p = 0.2016$ ), monocytes ( $p = 0.1527$ ), and granular  
205 leukocytes ( $p = 0.4879$ ) (Fig 3).

206

207 **Fig 3. Leukogram of *R. quelen* anesthetized with increasing concentrations of**  
208 **tricaine (MS-222).**

209 There was no statistical difference among treatments ( $p > 0.05$ ). Data expressed as  
210 Mean  $\pm$  SEM.

211

212 A significant difference ( $p = 0.0324$ ) was observed in sperm motility rate between  
213 animals anesthetized with the highest anesthetic concentration ( $300 \text{ mg L}^{-1}$ ,  $66.25 \pm$   
214  $5.6 \%$ ) and control animals ( $90.00 \pm 4.47 \%$ ). However, control animals did not differ  
215 statistically from the animals anesthetized with  $100$  and  $200 \text{ mg L}^{-1}$  MS-222 ( $80.00 \pm$   
216  $4.36 \%$  and  $74.29 \pm 6.12 \%$ , respectively) (Fig 4A). There was no difference among  
217 treatments in membrane integrity ( $p = 0.4135$ ; Fig 4B) and morphology ( $p = 0.4430$ ; Fig  
218 4C).

219

220 **Fig 4. Qualitative variables of *R. quelen* semen anesthetized with increasing**  
221 **concentrations of tricaine (MS-222).**

222 A: Motility (%); B: Membrane integrity (%); C: Normal morphology (%). Different  
223 letters indicate significant difference by the Tukey test ( $p < 0.05$ ). Data expressed as  
224 Mean  $\pm$  SEM.

225

226 The variables of spermatid morphology are shown in Table 2. There was no  
227 significant difference among treatments, showing that anesthesia did not influence the  
228 percent of spermatozoa with simple bent tail, fractured tail, strongly coiled tail, coiled tail  
229 distal, proximal droplet, distal droplet, macrocephaly, microcephaly, head degeneration,  
230 and free normal head.

231

232

233

234

235 **Table 2.** Sperm morphology in *R. quelen* semen anesthetized with increasing  
 236 concentrations of tricaine (MS-222).  
 237

| Variables (%)        | Tricaine (MS-222) |           |           |           | Value of p |
|----------------------|-------------------|-----------|-----------|-----------|------------|
|                      | 0 mg/L            | 100 mg/L  | 200 mg/L  | 300 mg/L  |            |
| Simple bent tail     | 8.29±1.52         | 8.57±1.87 | 7.79±2.19 | 5.69±1.05 | 0.5923*    |
| Fractured tail       | 1.93±1.06         | 2.00±0.53 | 1.71±0.34 | 1.81±0.54 | 0.7922**   |
| Strongly coiled tail | 6.29±2.57         | 6.07±1.33 | 4.29±1.57 | 5.31±1.93 | 0.8840*    |
| Coiled tail distal   | 4.14±1.02         | 5.50±1.69 | 4.93±1.22 | 4.94±2.08 | 0.9498*    |
| Proximal droplet     | 0.21±0.15         | 0.21±0.15 | 0.36±0.24 | 0.44±0.29 | 0.9944**   |
| Distal droplet       | 4.14±2.57         | 4.07±1.90 | 3.43±1.43 | 0.63±0.37 | 0.2037**   |
| Macrocephaly         | 1.57±1.19         | 0.43±0.23 | 0.36±0.14 | 0.31±0.21 | 0.8551**   |
| Microcephaly         | 0.64±0.42         | 0.07±0.07 | 0.71±0.63 | 0.19±0.09 | 0.6253**   |
| Head degeneration    | 3.86±1.48         | 2.07±0.59 | 2.14±0.92 | 1.63±0.49 | 0.8073**   |
| Free normal head     | 0.29±0.10         | 0.93±0.43 | 0.57±0.35 | 0.44±0.20 | 0.7289**   |

238 \* Not significant by analysis of variance ( $p>0.05$ ). \*\* Not significant by analysis Kruskal-  
 239 Wallis ( $p>0.05$ ). Data expressed as Mean±SEM.  
 240

241 Regression models were applied on the variables that showed a significant  
 242 difference among the treatments (Fig 5). Increasing concentrations of MS-222 showed a  
 243 linear negative effect on anesthetic induction and motility rate, i.e., the higher the  
 244 anesthetic concentration for *R. quelen*, the shorter the time fish took to enter the anesthesia  
 245 induction stage and the lower the sperm motility rate. Estradiol presented a quadratic  
 246 (polynomial) negative response to increasing levels of MS-222, i.e., as the anesthetic  
 247 concentration for *R. quelen* increased, lower blood estradiol levels were maintained until  
 248 reaching a point where estradiol levels began to rise again. According to the quadratic  
 249 regression equation, the MS-222 concentration value where the hormone reached its  
 250 minimum was 204.41 mg L<sup>-1</sup>.

251

252 **Fig 5. Graphical representation of the regression analysis that presented statistical**  
253 **significance.**

254 A: Induction of anesthesia (seconds); B: Motility rate (%); C: Estradiol (ng/mL).

255

256 Pearson's correlation analysis was applied to all variables to detect variables that  
257 were related to each other, and graphs presenting the significant correlations are shown  
258 in Fig 6. In the correlation analyses, we observed a negative correlation between  
259 anesthesia induction time and percent of lymphocytes ( $R^2 = -0.39$ ,  $p < 0.05$ ), percent of  
260 lymphocytes and neutrophils ( $R^2 = -0.94$ ,  $p < 0.001$ ), percent of lymphocytes and  
261 monocytes ( $R^2 = -0.44$ ,  $p < 0.05$ ), and between the percent of lymphocytes and granular  
262 leukocytes ( $R^2 = -0.45$ ,  $p < 0.05$ ). A positive correlation was observed between the percent  
263 of neutrophils and anesthesia induction time ( $R^2 = 0.46$ ,  $p < 0.05$ ), and between estradiol  
264 and percent of monocytes ( $R^2 = 0.56$ ,  $p < 0.01$ ).

265

266 **Fig 6. Graphical representation of Pearson correlation analyzes that presented**  
267 **statistical significance.**

268 A: Lymphocytes (%) x Induction of anesthesia (seconds); B: Neutrophils (%) x Induction  
269 of anesthesia (seconds); C: Neutrophils (%) x Lymphocytes (%); D: Lymphocytes (%) x  
270 Monocytes (%); E: Lymphocytes (%) x Granular leukocytes (%); F: Monocytes (%) x  
271 Estradiol (ng / mL).

272

## 273 **4. Discussion**

274 In this study, we evaluated the effects of different anesthetic (MS-222)  
275 concentrations on the sexual steroids hormonal profile, sperm quality maintenance, and  
276 stress response of *R. quelen* males during the reproductive management.

277 Anesthesia induction time for *R. quelen* decreased linearly with MS-222  
278 concentration increase. Biological factors such as life cycle stages, age, size, weight, lipid  
279 content, and health need to be considered during the use of anesthetics, since the different  
280 biological factors are strictly correlated [22] and could cause different reactions and  
281 increased fish susceptibility to anesthetics. It is known that resistance and tolerance to

282 different anesthetics vary among individuals and species [23]. In the present study, an  
283 increase in cortisol values was observed accompanying the increase in anesthetic  
284 concentration. Although no significant difference was detected, this alteration may be  
285 related to the possible irritation caused by the anesthetic bath. Moreover, studies have  
286 shown that the use of MS-222 (100 mg L<sup>-1</sup>) for juvenile *Ictalurus punctatus* increased  
287 cortisol over the basal concentration after 5 min of sedation [24]. In this study, the mean  
288 time of anesthesia using 100 mg L<sup>-1</sup> considerably exceeded 5 min, which may have  
289 contributed to the blood cortisol increase in these fish. In addition, during exposure to  
290 MS-222, as the anesthetic begins to take effect, loss of balance may cause a stress  
291 response [15].

292 In both human and veterinary medicine, a sedative is often administered prior to  
293 anesthesia for the purpose of calming the patient and reducing the stress that the anesthetic  
294 or anesthetic procedure may cause [15].

295 The basal cortisol concentration in *R. quelen* males is 15.86 ng/mL, after acute  
296 stress, the concentration reaches 158.12 ng/mL [25] and the peak values range from 158.0  
297 (males) to 207.0 ng/mL (females), 1 h after handling the animals [11]. In the present  
298 study, animals in the control group had a mean cortisol value of  $96.86 \pm 7.08$  ng/mL,  
299 identifying a state of acute stress that may have been caused by hormonal induction  
300 approximately 10 h prior to collection of semen and blood. In addition, the concentrations  
301 of MS-222 tested did not reduce plasma cortisol concentration, consistent with the results  
302 of a previous study [26], where MS-222 was not able to prevent the increase of cortisol  
303 in *Pimephales promelas*. It is possible that an increased response to stress during the  
304 anesthetic procedure may have occurred due to the low availability of oxygen caused by  
305 insufficient gill ventilation or by direct stimulation of the hypothalamic–pituitary–  
306 interrenal axis (HHI) [27].

307           Currently, there is still insufficient knowledge to define when the limits of  
308 homeostatic fluctuations have been exceeded, leading to the state of stress [10]. Thus,  
309 although the circulating cortisol level is the most evaluated indicator in order to measure  
310 the stress response in fish, it should be interpreted in conjunction with other physiological  
311 variables [28]. Therefore, since the amplitude of physiological parameters in fishes has  
312 not yet been fully elucidated and it is important to consider as many variables as possible  
313 for determining the presence of stress, cortisol analysis alone is not the best way of  
314 evaluating the response to stress.

315           It is believed that the deleterious effects of stress on the immune response are  
316 preferentially mediated by the suppressive effects of glucocorticoids (i.e. cortisol) and are  
317 a consequence of the inability to adapt to chronic stressors [29]. Contrastingly, fish  
318 immune response against an acute stress is to enhance innate function to prepare the  
319 immune system for challenges such as the neuroendocrine systems for fight-or flight [30].

320           After evaluating *R. quelen* hematological parameters, it was identified that  
321 thrombocytes and lymphocytes are the most frequent organic defense cells, lymphocytes  
322 being the largest representative of leukocytes [31]. Previous research [32] has  
323 demonstrated that acute stress may cause a reduction in the number of circulating  
324 lymphocytes, monocytes and special granulocytic cells (SGC) in *R. quelen*, as well as the  
325 potential increase in percentage of circulating neutrophils. In the present study, no  
326 significant difference was observed among treatments for differential leukocyte count.

327           The administration of exogenous cortisol results in lower oocyte growth,  
328 condition factor, and plasma levels of testosterone and 17- $\beta$ -estradiol in *Oreochromis*  
329 *mossambicus* [33]. A study carried out with *R. quelen* females showed that the high level  
330 of plasma cortisol resulted in lower concentrations of plasma 17- $\beta$ -estradiol [8]. The  
331 authors have suggested the possibility of an inhibitory effect of estradiol on aromatase,

332 an enzyme that converts testosterone to estradiol. This fact corroborates the results  
333 obtained in the present study for the determination of plasma 17- $\beta$ -estradiol, found in a  
334 lower concentration in the animals with a higher level of plasma cortisol [8].

335 The increase in cortisol may be associated with sperm motility reduction, since it  
336 was observed that in males of *Oncorhynchus mykiss* that cortisol level increase in fish  
337 confined alone in small tanks was related to a 10 % reduction in sperm motility [34]. It is  
338 also possible that stress hormones may interfere with plasma osmolarity and impair sperm  
339 quality [12]. Acute stress during capture and transport resulted in dilution of blood plasma  
340 and semen osmolality in mature males *Morone chrysops*, consequently decreasing  
341 motility rate [35]. Osmolarity is an important aspect of sperm quality, since it is a  
342 determinant factor for activation of sperm motility [36, 37]. In addition to cortisol,  
343 anesthetics may also interfere with this parameter, since direct contact between MS-222  
344 and sperm decreased the sperm motility time of *O. mykiss* [28]. In the present study,  
345 sperm motility presented a negative linear response, suggesting that stress-related  
346 hormones have induced osmoregulatory dysfunctions [38] causing blood plasma dilution  
347 and alteration in seminal plasma osmolarity [37], causing pre-activation of spermatozoa  
348 and, consequently, decreased sperm motility [35].

349 The use of MS-222 for anesthesia of *R. quelen* breeding herds influenced many of  
350 the evaluated variables, and several variables correlated with each other as a response to  
351 MS-222. We observed a negative correlation between anesthesia induction time and the  
352 percentage of lymphocytes, as well as a positive correlation between anesthesia induction  
353 time and the percentage of neutrophils. The results show that leukocytes are sensitive to  
354 the changes caused by stressful factors of reproductive management and the anesthetic  
355 procedure. Thus, hormone levels and differential leukocyte counts could be good  
356 indicators of the efficacy of MS-222 anesthesia in male *R. quelen* breeding. However, for

357 a better understanding of MS-222 influence on the reproduction of *R. quelen* males, we  
358 suggest that further studies test other anesthetic concentration ranges and evaluate other  
359 reproductive and stress response parameters.

360 At the concentrations studied (100, 200, and 300 mg L<sup>-1</sup>), the anesthetic MS-222  
361 was not efficient for decreasing plasma cortisol levels. In addition, there was a decrease  
362 in sperm motility rate and a reduction in plasma levels of estradiol. Therefore, anesthesia  
363 with MS-222 at these concentrations is not indicated for *R. quelen* breeding males.

364

## 365 **Acknowledgements**

366 This research was supported by Conselho Nacional de Desenvolvimento Científico e  
367 Tecnológico (CNPq).

368

## 369 **References**

370 [1] Barton BA. Stress in fishes: a diversity of responses with particular reference to  
371 changes in circulating corticosteroids. **Integrative and Comparative Biology**. 2002; 42:  
372 517-525.

373

374 [2] Maricchiolo G, Genovese L. Some contributions to knowledge of stress response in  
375 innovative species with particular focus on the use of the anaesthetics. **The Open Marine**  
376 **Biology Journal**. 2011; 5: 24-33.

377

378 [3] Sutherland M, Dowling S, Shaw R, Hickey J, Fraser D, Cameron C, et al. Stress-  
379 Induced Immunomodulation in Low and High Reactive Sheep. **Animals**. 2019; 9: 1-13.

380

381 [4] Robinson NA, Johnsen H, Moghadam H, Andersen Ø, Tveiten H. Early  
382 Developmental Stress Affects Subsequent Gene Expression Response to an Acute Stress  
383 in Atlantic Salmon: An Approach for Creating Robust Fish for Aquaculture. **G3:**  
384 **Genes|genomes|genetics**. 2019; 9:1597-1611.

385

386 [5] Hantsoo L, Kornfield S, Iannelli C, Podcasy J, Metzger D, Sammel MD, et al.  
387 Glucocorticoid-immune response to acute stress in women and men living with HIV.  
388 **Springer Nature**, 2019. doi: 10.1007/s10865-019-00029-0.

389



- 390 [6] Verbeek E, Colditz I, Blache D, Lee C. Chronic stress influences attentional and  
391 judgement bias and the activity of the HPA axis in sheep. **Plos One**. 2019; 14: 1-23.  
392
- 393 [7] Gormally BMG, Fuller R, McVey M, Romero LM. DNA damage as an indicator of  
394 chronic stress: Correlations with corticosterone and uric acid. **Comparative**  
395 **Biochemistry And Physiology Part A: Molecular & Integrative Physiology**. 2019; 227:  
396 116-122.  
397
- 398 [8] Soso AB, Barcellos LJG, Ranzani-Paiva MJ, Kreutz LC, Quevedo RM, Lima M, et  
399 al. The Effects of Stressful Broodstock Handling on Hormonal Profiles and Reproductive  
400 Performance of *Rhamdia quelen* (Quoy & Gaimard) Females. **Journal of the World**  
401 **Aquaculture Society**.2008; 39: 835-841.  
402
- 403 [9] Balasch JC, TORT L. Netting the Stress Responses in Fish. **Frontiers In**  
404 **Endocrinology**. 2019; 10:1-12.  
405
- 406 [10] Schreck CB. Stress and fish reproduction: The roles of allostasis and  
407 hormesis. **General And Comparative Endocrinology**. 2010; 165: 549-556.  
408
- 409 [11] Barcellos LJG, Souza SMG, Woehl VM. Estresse em peixes: fisiologia da resposta  
410 ao estresse, causas e consequências (revisão). **Boletim do Instituto da Pesca**. 2000; 26:  
411 99-111.  
412
- 413 [12] Rurangwa E, Kime DE, Ollevier F, Nash JP. The measurement of sperm motility  
414 and factors affecting sperm quality in cultured fish. **Aquaculture**. 2004; 234: 1-28.  
415
- 416 [13] Schreck CB, Contreras-Sanchez W, Fitzpatrick MS. Effects of stress on fish  
417 reproduction, gamete quality, and progeny. **Aquaculture**.2001; 197: 3-24.  
418
- 419 [14] Pereira-Da-Silva EM, De Oliveira RHF, Ribeiro MAR, Coppola MP. Efeito  
420 anestésico do óleo de cravo em alevinos de lambari. **Ciência Rural**. 2009; 39: 1851-1856.  
421
- 422 [16] Sneddon LU. Clinical anesthesia and analgesia in fish. **Journal of Exotic Pet**  
423 **Medicine**. 2012; 21: 32-43.  
424
- 425 [17] Gressler LT, Parodi TV, Riffel APK, Costa ST da, Baldisserotto B. Immersion  
426 anaesthesia with tricaine methanesulphonate or propofol on different sizes and strains of  
427 silver catfish *Rhamdia quelen*. **Journal Of Fish Biology**. 2012; 81: 1436-1445.  
428
- 429 [18] Vidal LVO, Furuya WM, Graciano TS, Schamber CR, Silva LCR da, Santos LD, et  
430 al. Eugenol como anestésico para juvenis de matrinxã (*Brycon cephalus*). **Rev. Bras.**  
431 **Saúde Prod. An**.2007; 8: 335-342.  
432
- 433 [19] Miliorini AB, Murgas LDS, Rosa PV, Oberlender G, Pereira GJM, Costa DV da. A  
434 morphological classification proposal for curimba (*Prochilodus lineatus*) sperm damages  
435 after cryopreservation. **Aquaculture Research**. 2011; 42: 177–187.  
436
- 437 [20] Ginsburg AS. Sperm-egg association and its relationship to the activation of the egg  
438 in salmonid fishes. **Journal of Embryology and Experimental Morphology**. 1963; 11:  
439 13-33.

- 440  
441 [21] Ranzani-Paiva MJT, Pádua SB de, Tavares-Dias M, Egami MI. Métodos para análise  
442 hematológica em peixes. 1st ed. Maringá: **Universidade Estadual de Maringá**, 2013.  
443
- 444 [22] Iversen, M. Finstad B, McKinley RS, Eliassen RA. The efficacy of metomidate, clove  
445 oil, Aqui-S™ and Benzoak® as anaesthetics in Atlantic salmon (*Salmo salar L.*) smolts,  
446 and their potential stress-reducing capacity. **Aquaculture**. 2003; 221: 549-566.  
447
- 448 [23] Hikasa Y, Takase K, Ogasawara T, Ogasawara S. Anesthesia and recovery with  
449 tricaine methanesulfonate, eugenol and thiopental sodium in the carp. *Cyprinus Carpio*.  
450 **Nippon Juigaku Zasshi, Towada**. 1986; 48: 341-351.  
451
- 452 [24] Smith MS, Booth NJ, Peterson BC, Stephens WS, Goudie CA, Simco BA. Analysis  
453 of Short-Term Cortisol Stress Response in Channel Catfish by Anesthetization with  
454 Metomidate Hydrochloride and Tricaine Methanesulfonate. **Journal Of Aquatic Animal**  
455 **Health**. 2015; 27: 152-155.  
456
- 457 [25] Barcellos, LJG, Woehl VM, Wassermann GF, Quevedo RM, Ittzés I, Krieger MH.  
458 Plasma levels of cortisol and glucose. In response to capture and tank transference in  
459 *Rhamdia quelen* (Quoy & Gaimard), a South American catfish. **Aquaculture Research**.  
460 2001; 32;121-123.  
461
- 462 [26] Palić D, Herolt DM, Andreasen CB, Menzel BW, Roth JA. Anesthetic efficacy of  
463 tricaine methanesulfonate, metomidate and eugenol: Effects on plasma cortisol  
464 concentration and neutrophil function in fathead minnows (*Pimephales promelas*  
465 Rafinesque, 1820). **Aquaculture**. 2006; 254: 675-685.  
466
- 467 [27] Bolasina, S. N. Cortisol and hematological response in Brazilian codling, *Urophycis*  
468 *brasiliensis* (Pisces, Phycidae) subjected to anesthetic treatment. **Aquaculture**  
469 **International**. 2006; 14: 569-575.  
470
- 471 [28] Wagner E, Arndt R, Hilton B. Physiological stress responses, egg survival and sperm  
472 motility for rainbow trout broodstock anesthetized with clove oil, tricaine  
473 methanesulfonate or carbon dioxide. **Aquaculture**. 2002; 211: 353–366.  
474
- 475 [29] Nardocci G, Navarro C, Cortés PP, Imarai M, Montoya M, Valenzuela B, et al.  
476 Neuroendocrine mechanisms for immune system regulation during stress in fish. **Fish &**  
477 **Shellfish Immunology**. 2014; 40: 531-538.  
478
- 479 [30] Dhabhar, F. S. Effects of stress on immune function: the good, the bad, and the  
480 beautiful. **Immunologic Research**. 2014; 58:193-210.  
481
- 482 [31] Tavares-Dias M, Melo JFB, Moraes G, Moraes FR de. Características hematológicas  
483 de teleosteos brasileiros: IV. Variáveis do jundiá *Rhamdia quelen* (Pimelodidae). **Ciência**  
484 **Rural**. 2002; 32: 693-698.  
485
- 486 [32] Barcellos LJG, Kreutz LC, Souza C de, Rodrigues LB, Fioreze I, Quevedo RM.  
487 Hematological changes in jundiá (*Rhamdia quelen* Quoy and Gaimard Pimelodidae) after  
488 acute and chronic stress caused by usual aquacultural management, with emphasis on  
489 immunosuppressive effects. **Aquaculture**. 2004; 237: 229-236.

- 490  
491 [33] Foo JTW, Lam TJ. Retardation of ovarian growth and depression of serum steroid  
492 levels in the tilapia, *Oreochromis mossambicus*, by cortisol. **Aquaculture**.1993; 115:  
493 133–143.  
494  
495 [34] Bobe J, Labbé C. Egg and sperm quality in fish. **General and Comparative**  
496 **Endocrinology**. 2010; 165: 535-548.  
497  
498 [35] Allyn ML, Sheehan RJ, Kohler CC. The effects of capture and transportation stress  
499 on white bass semen osmolality and their alleviation via sodium chloride. **Trans. Am.**  
500 **Fish. Soc.** 2001; 130: 706–711.  
501  
502 [36] Alavi S, Cosson J. Sperm motility in fishes. (II) Effects of ions and osmolality: A  
503 review. **Cell Biology International**.2006; 30:1-14.  
504  
505 [37] Cosson J. Fish Sperm Physiology: Structure, Factors Regulating Motility, and  
506 Motility Evaluation. **Recent Developments In Fish Biology Researches [working**  
507 **Title]**. 2019. doi: 10.5772/intechopen.85139.  
508  
509 [38] Maltez LC, Barbas LAL, Okamoto MH, Lopes DLA, Romano LA, Sampaio LA, et  
510 al. Secondary Stress Responses in Juvenile Brazilian Flounder, *Paralichthys*  
511 *orbignyanus*, throughout and after Exposure to Sublethal Levels of Ammonia and  
512 Nitrite. **Journal Of The World Aquaculture Society**. 2018; 50: 346-358.

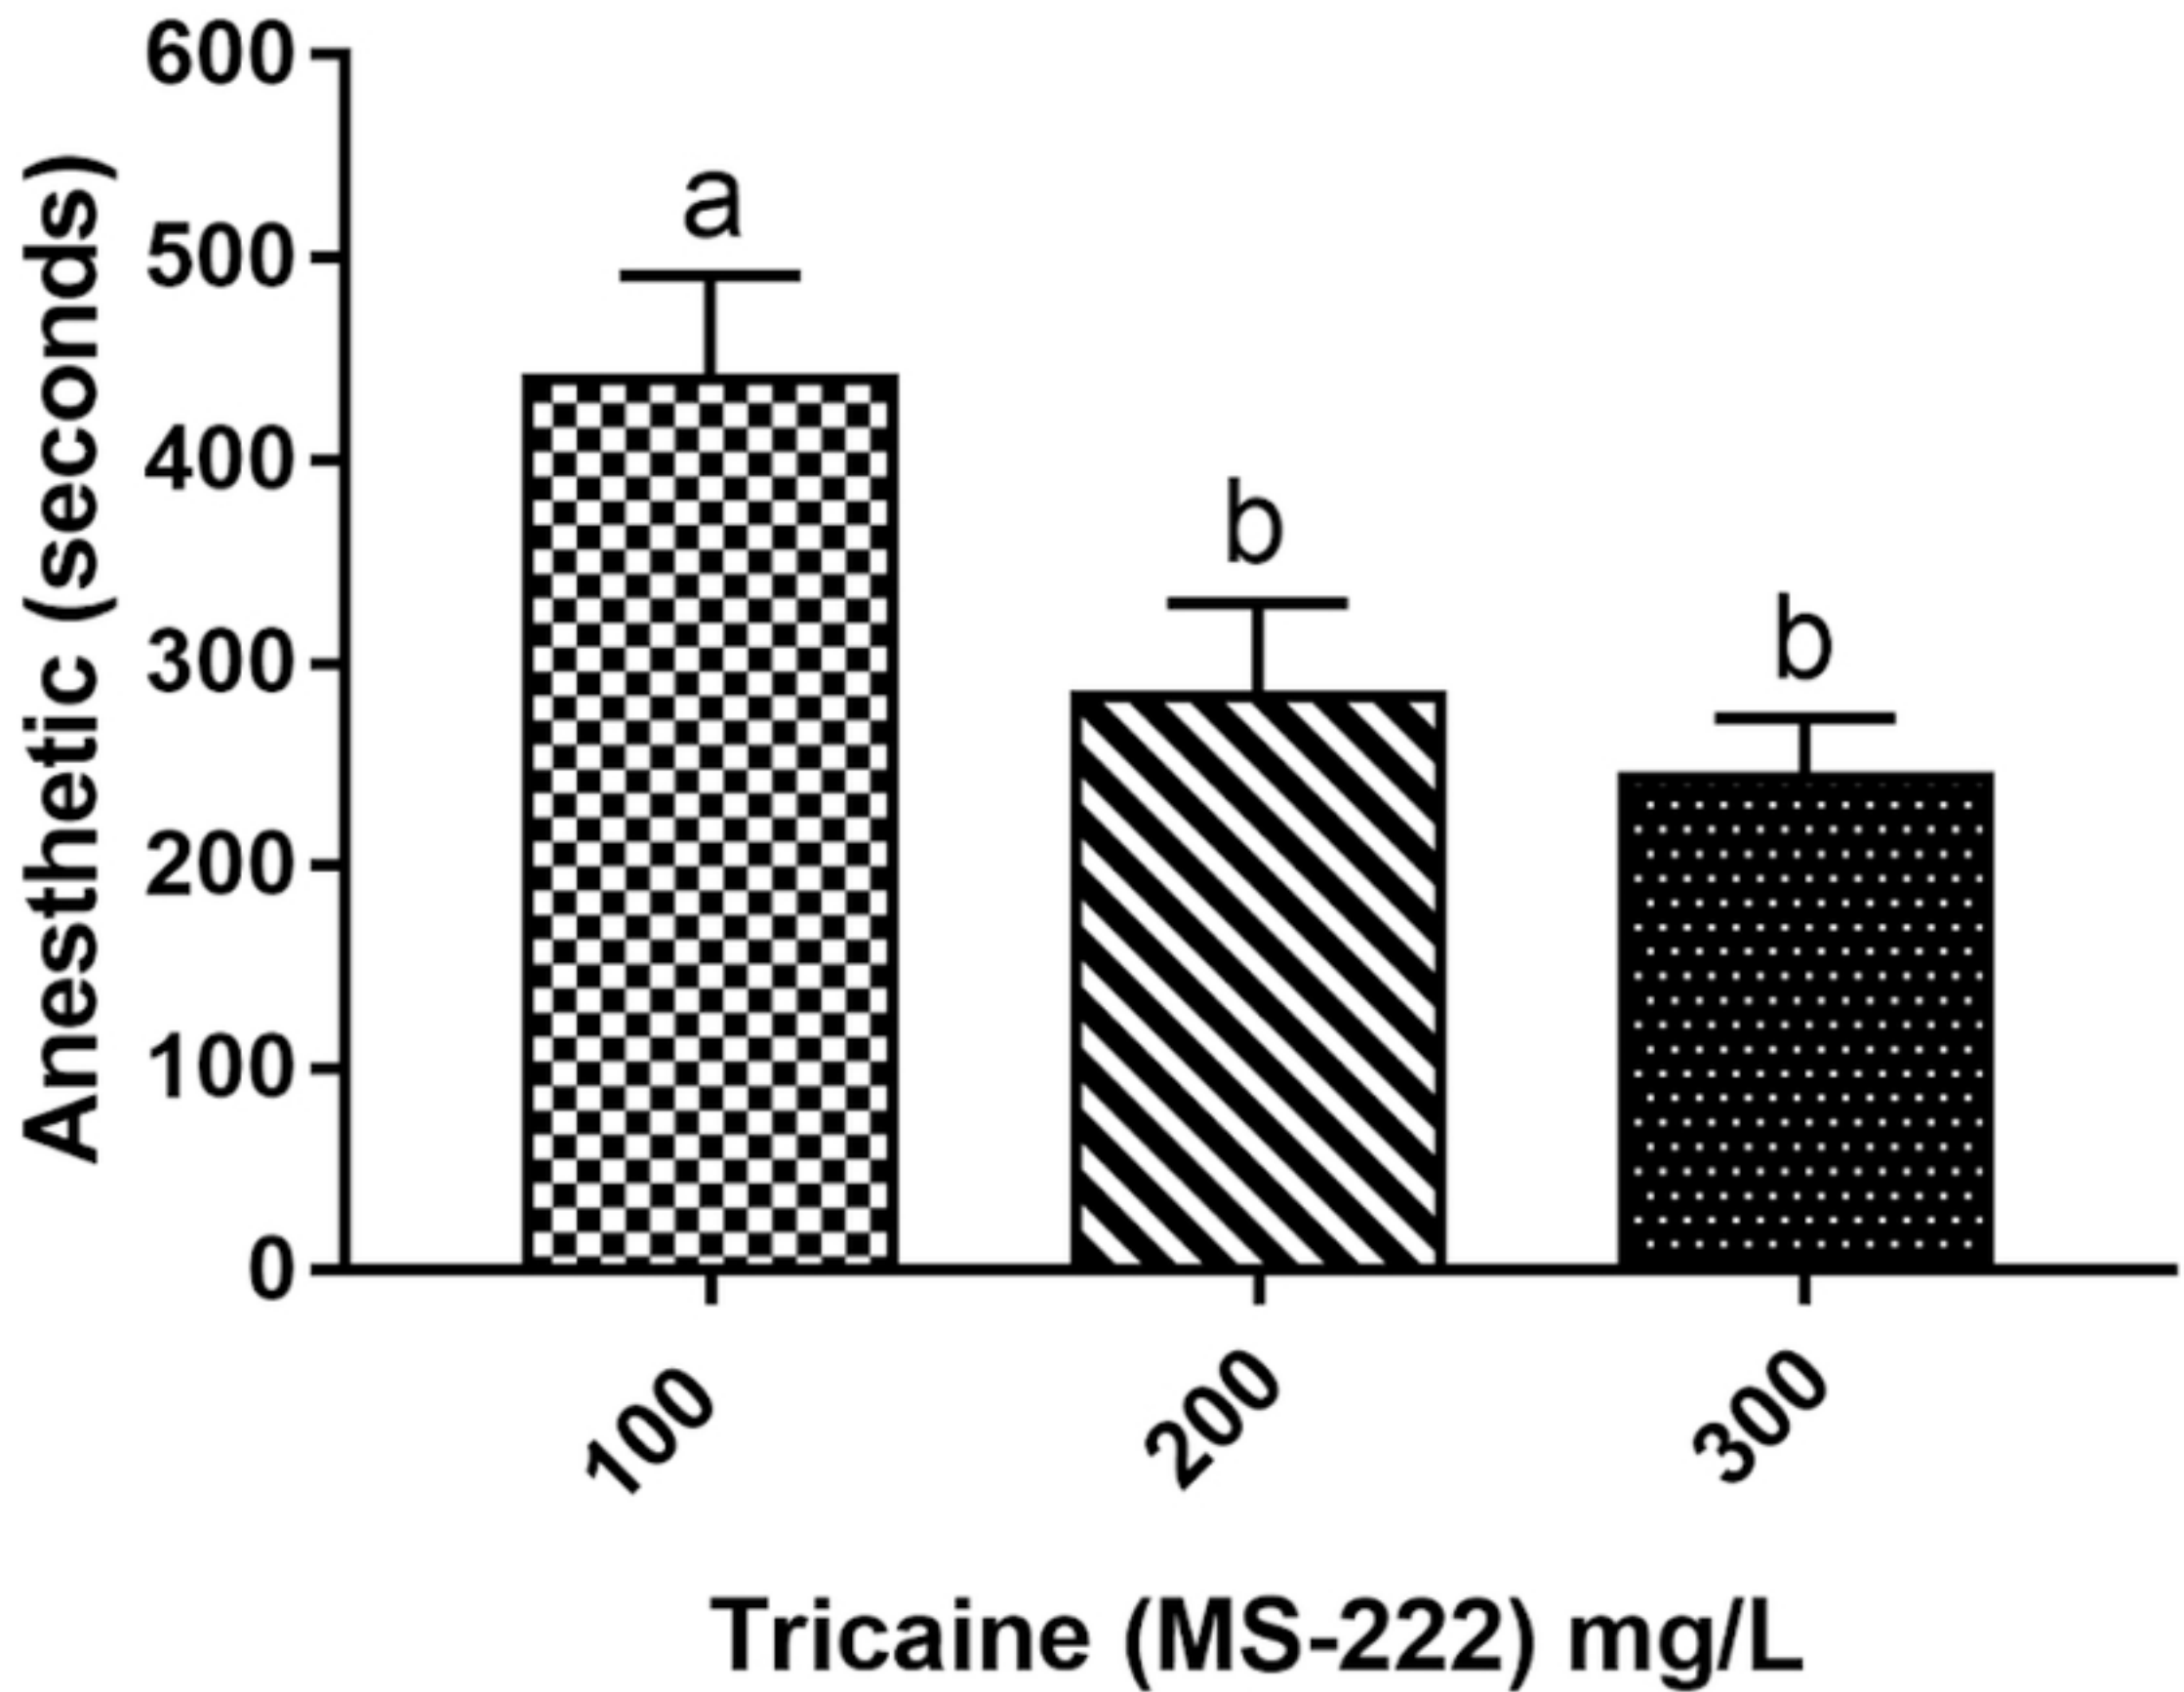

Figure 1

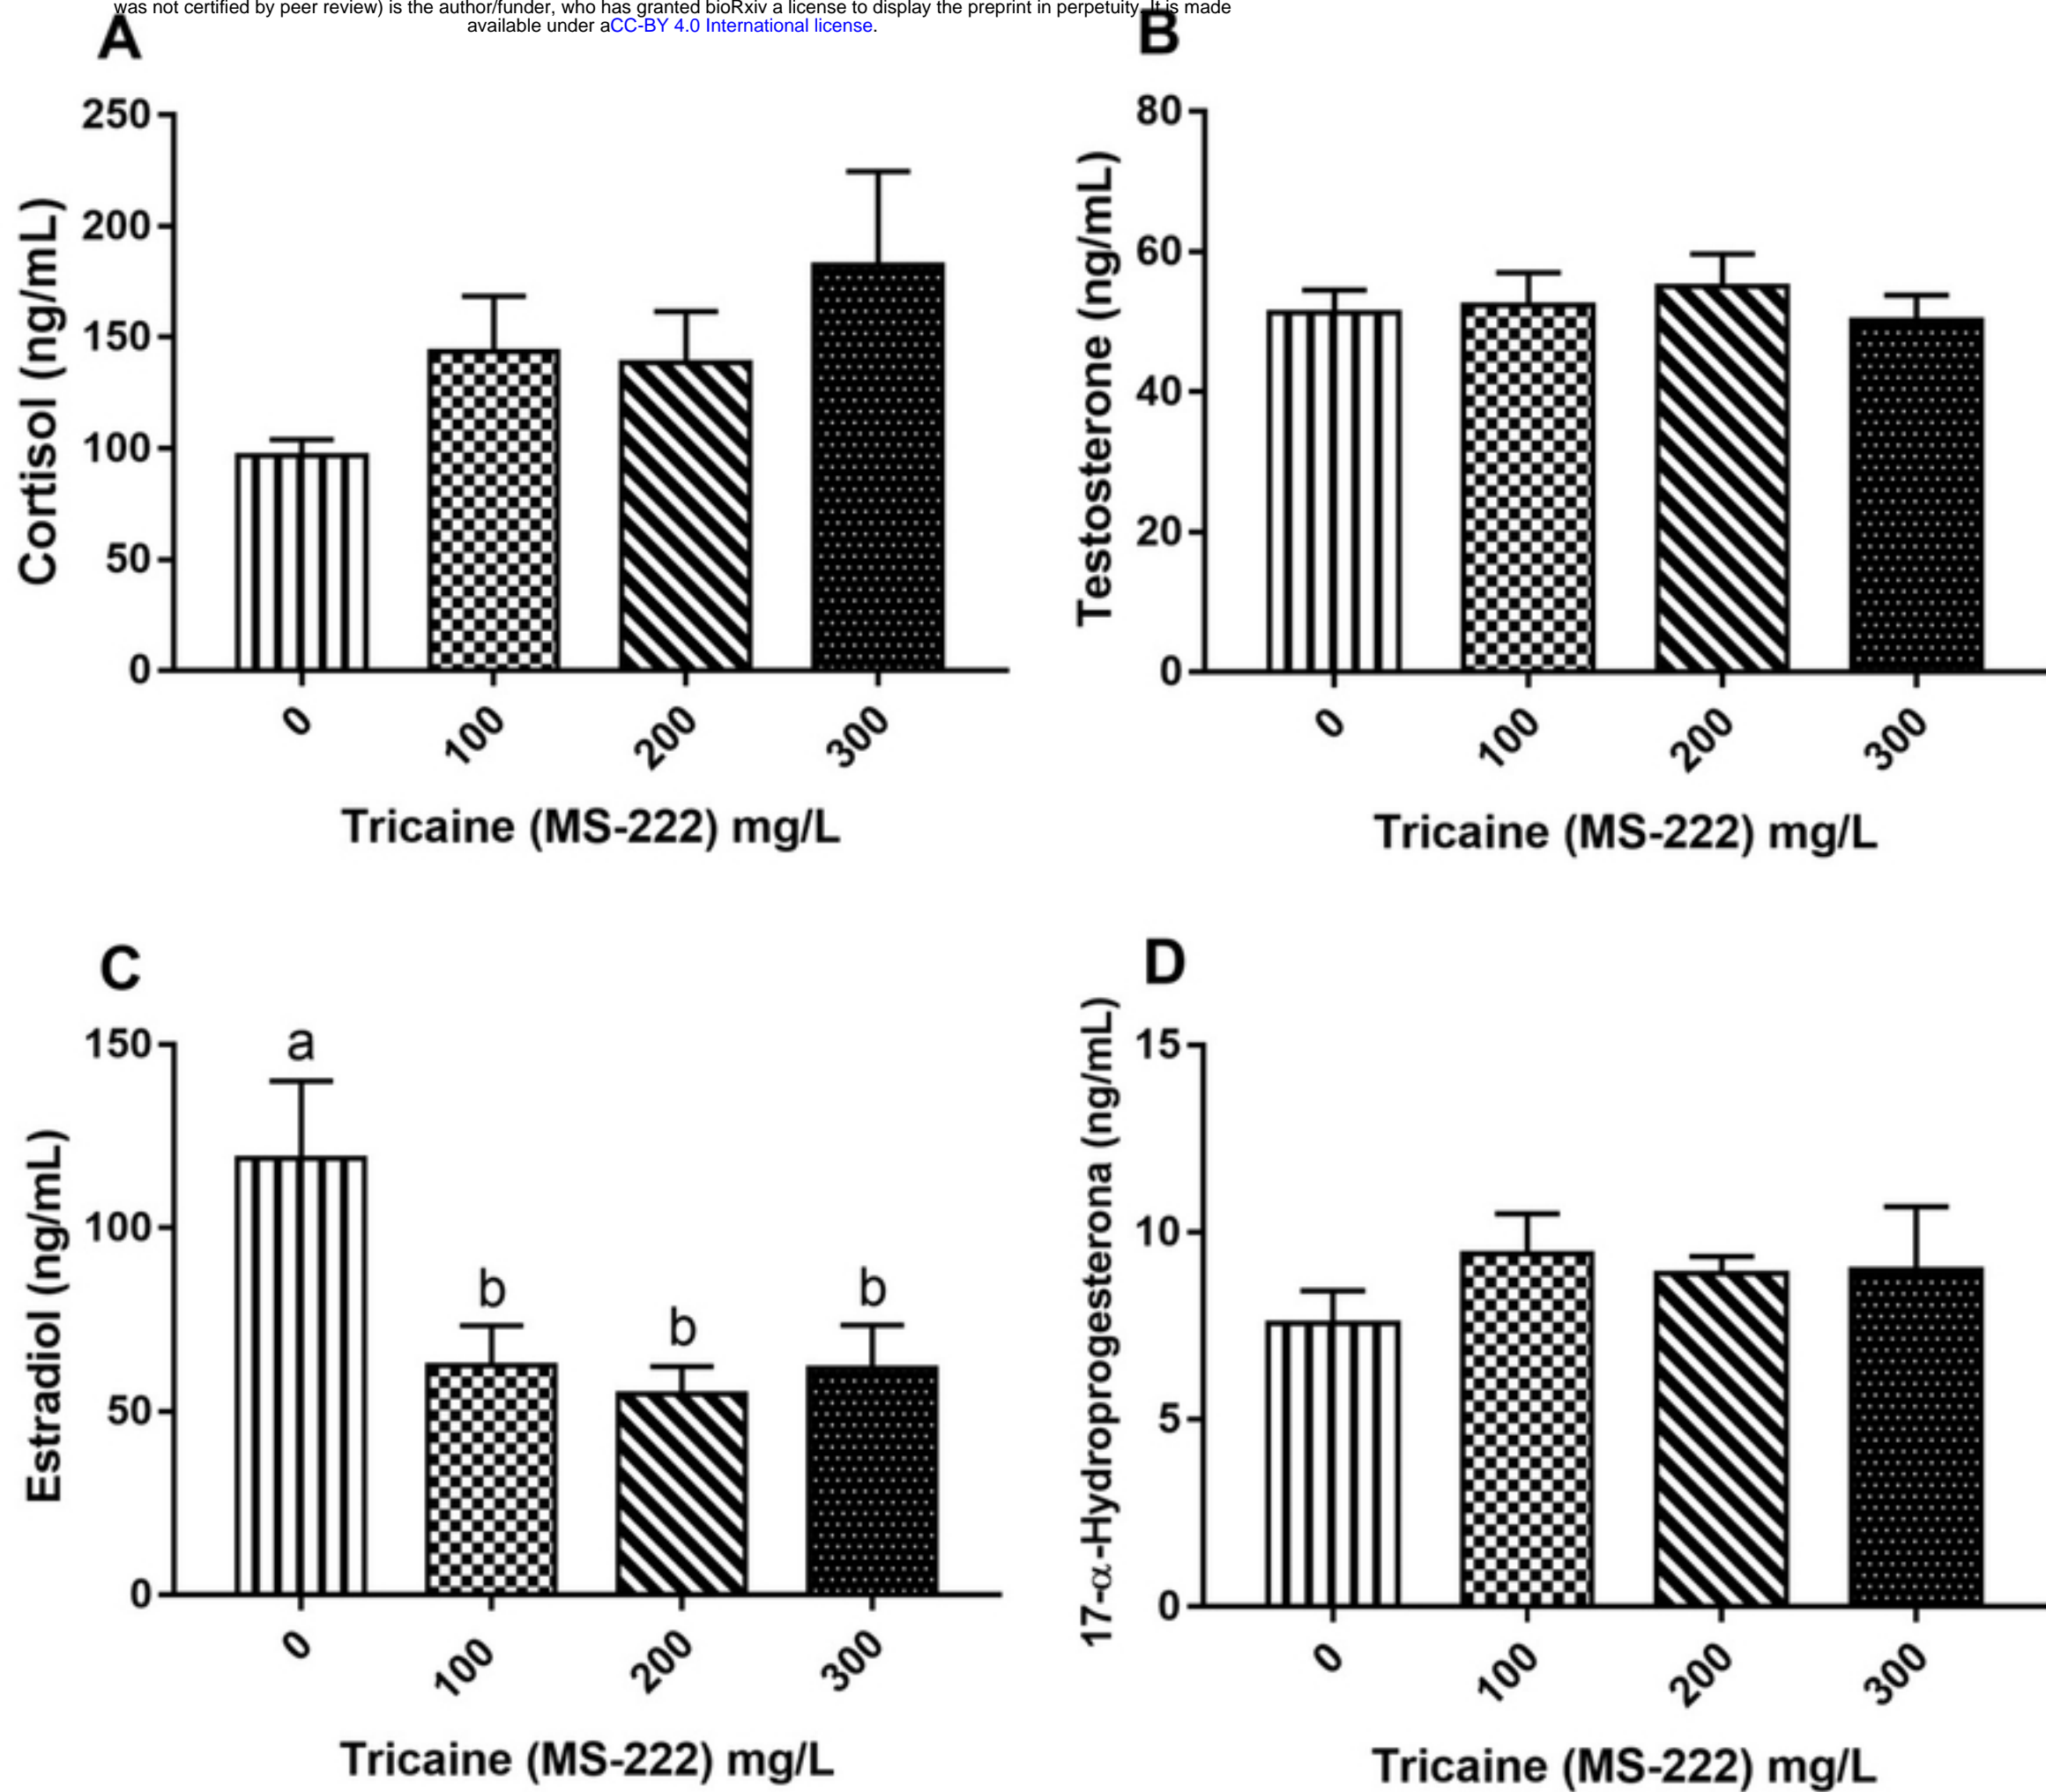

Figure 2

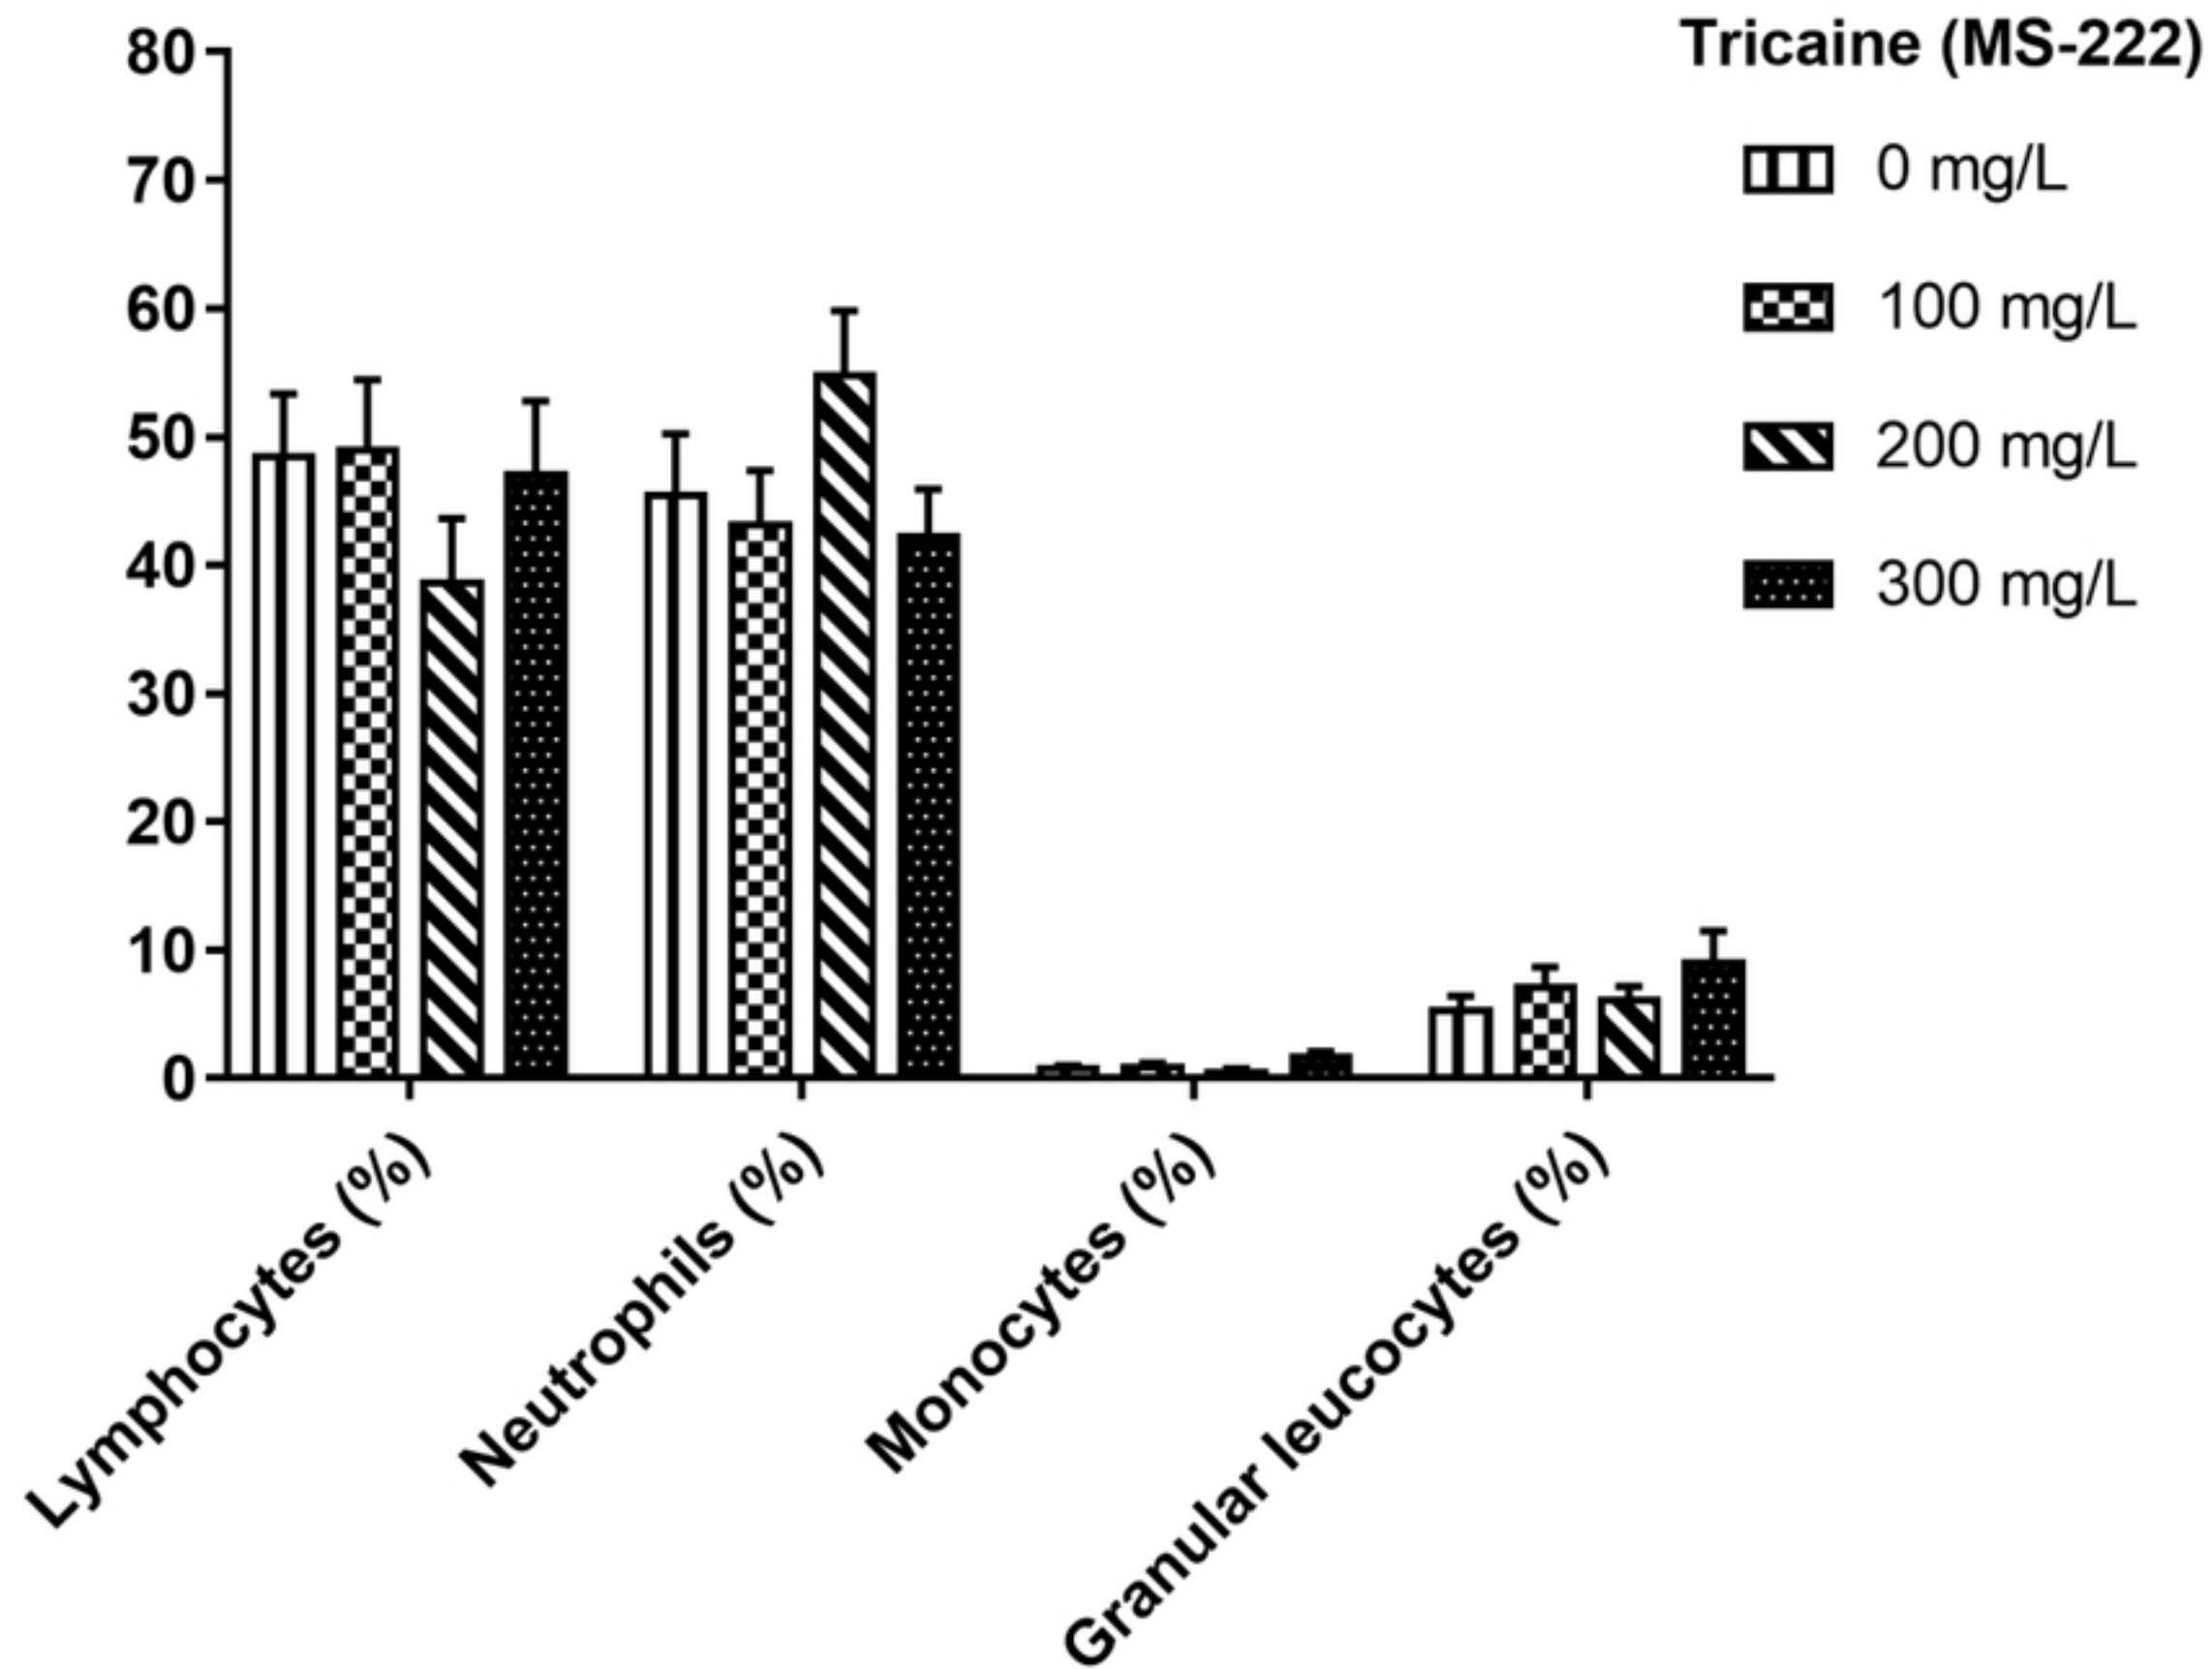

Figure 3

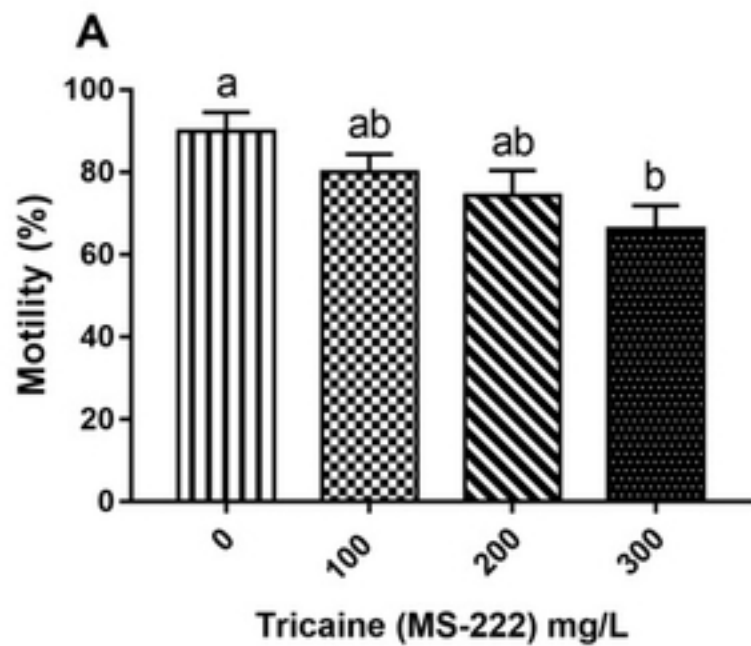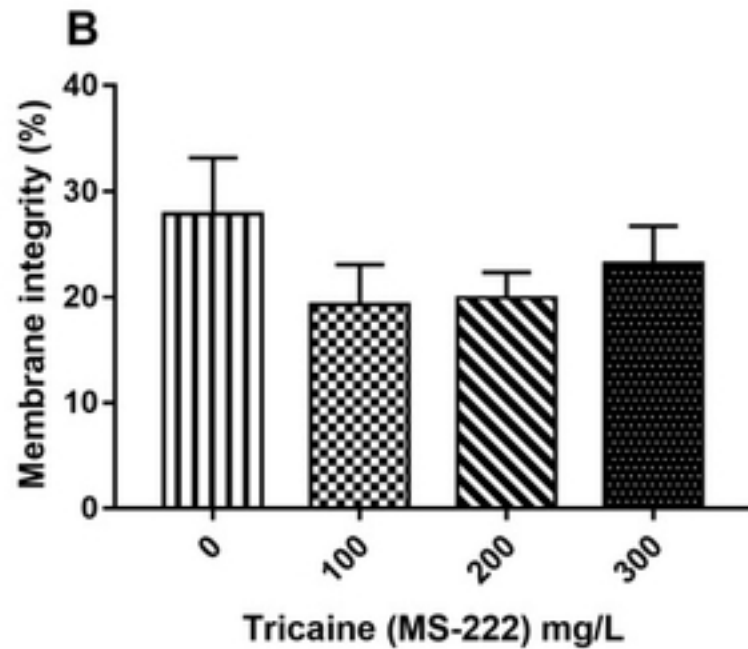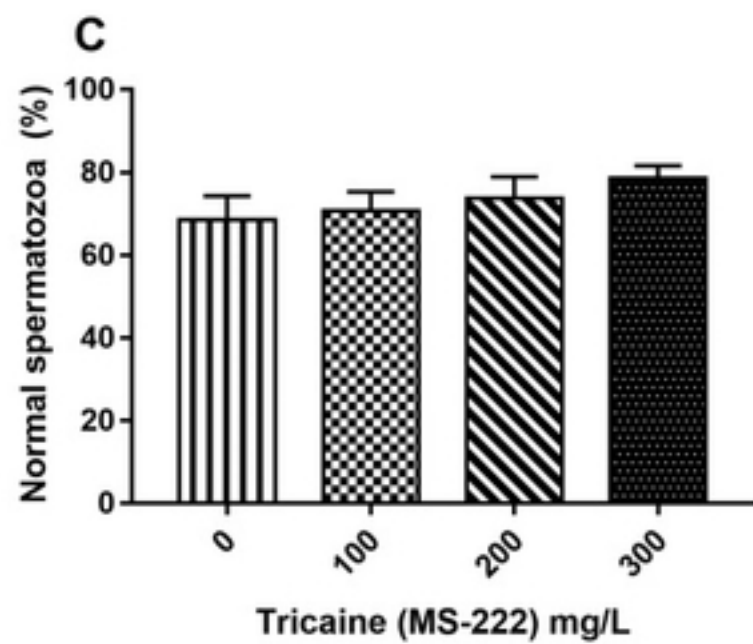

Figure 4

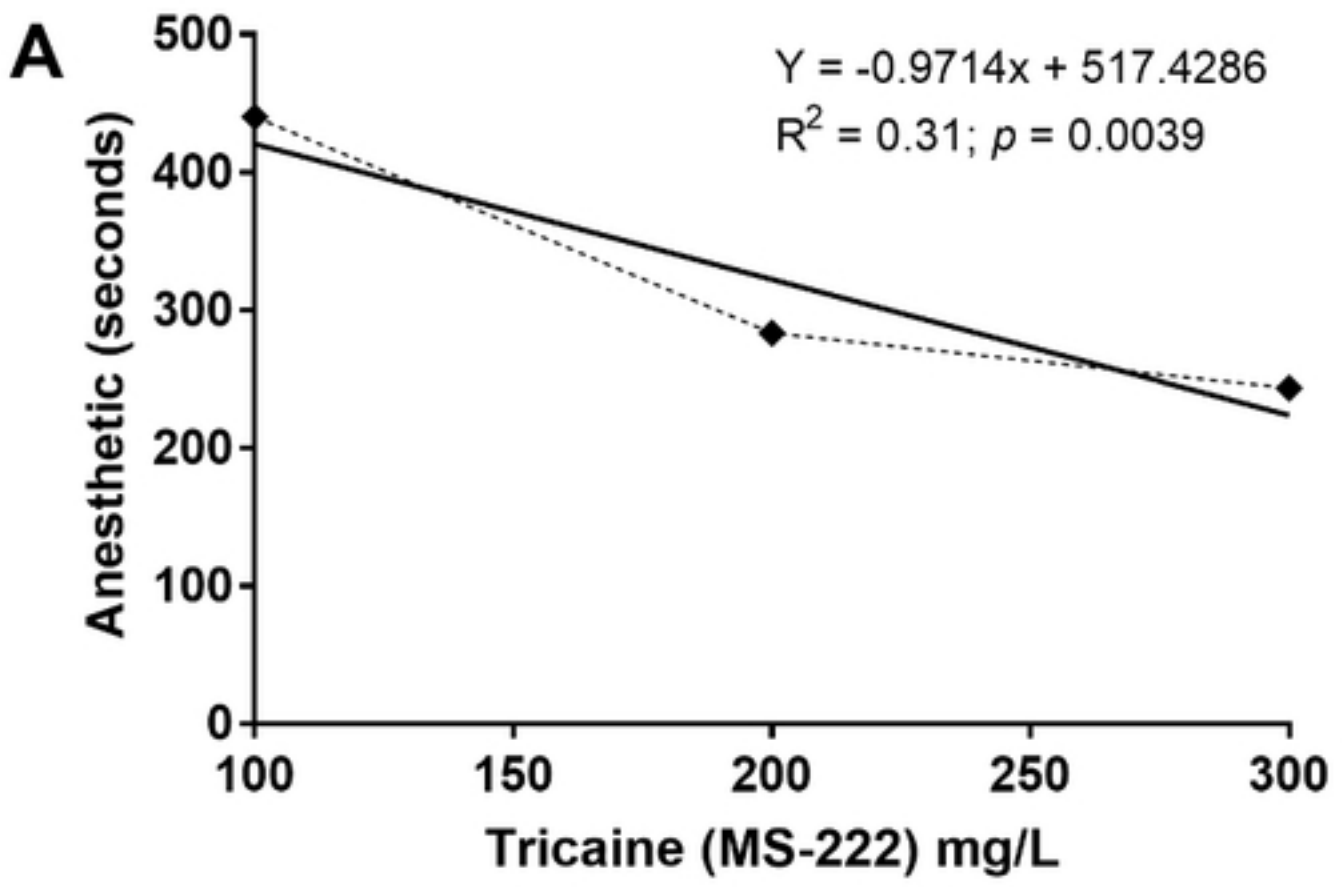

bioRxiv preprint doi: <https://doi.org/10.1101/759340>; this version posted September 5, 2019. The copyright holder for this preprint (which was not certified by peer review) is the author/funder, who has granted bioRxiv a license to display the preprint in perpetuity. It is made available under aCC-BY 4.0 International license.

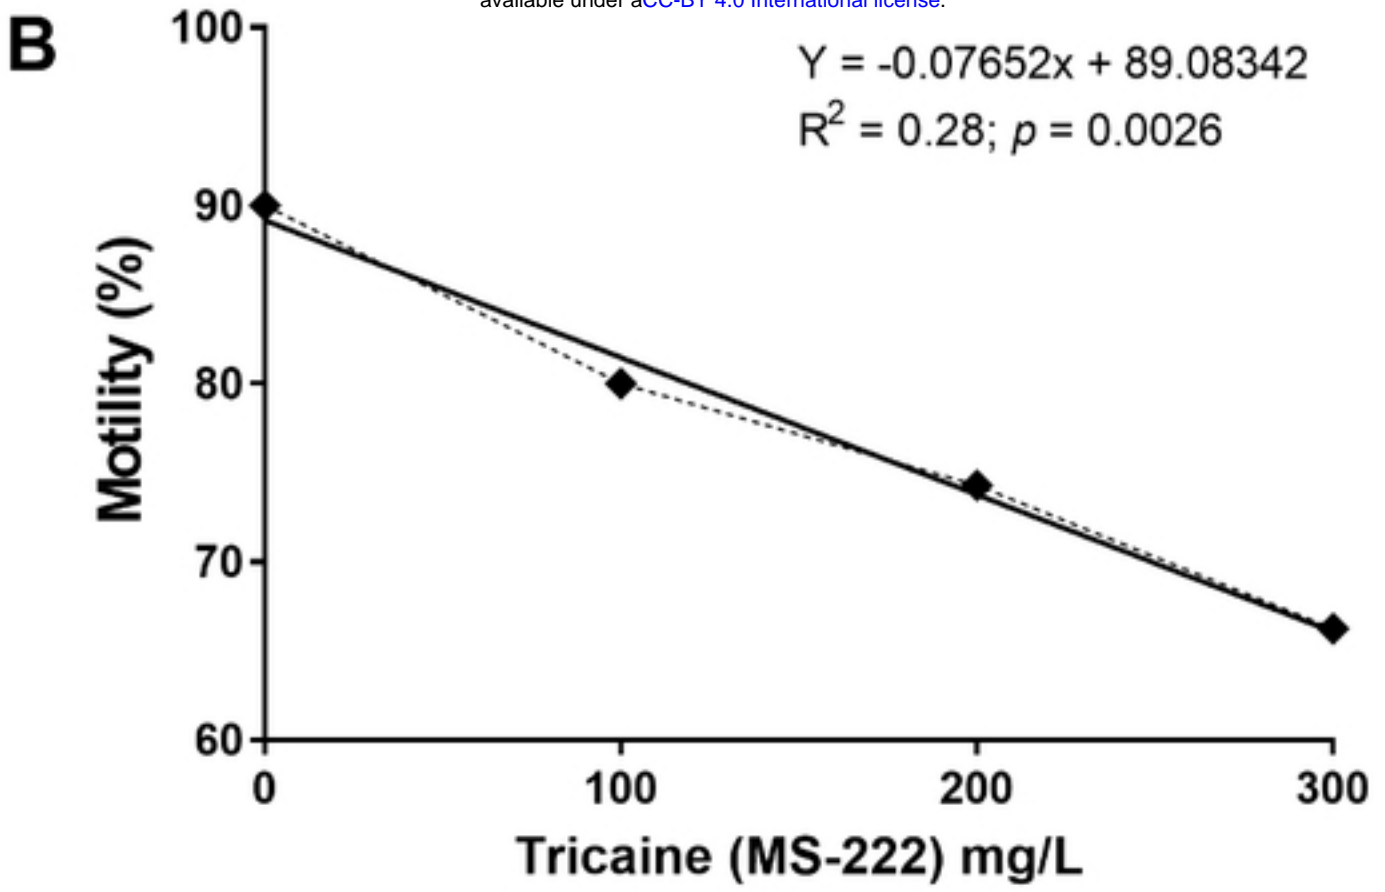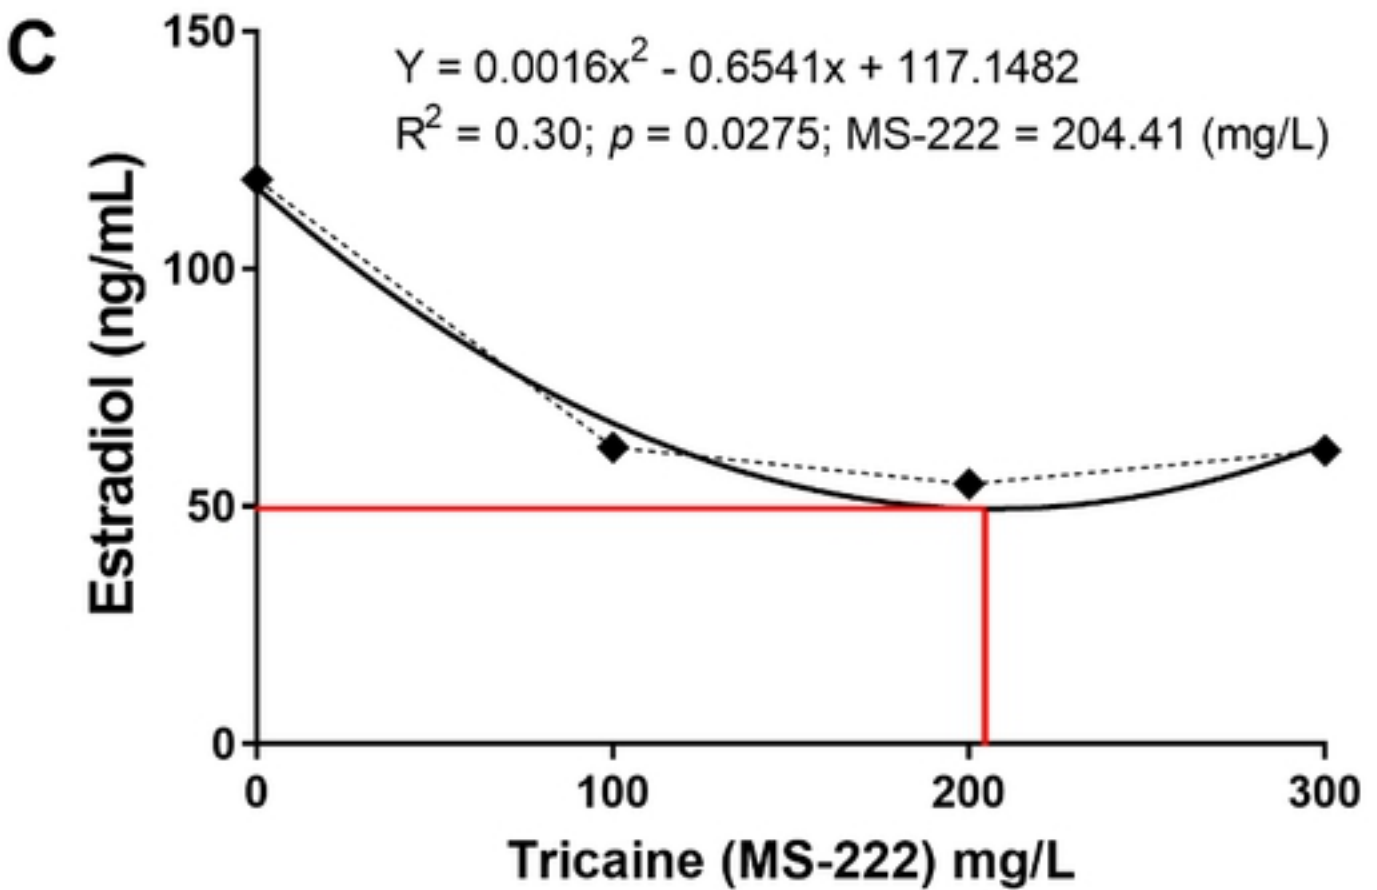

Figure 5



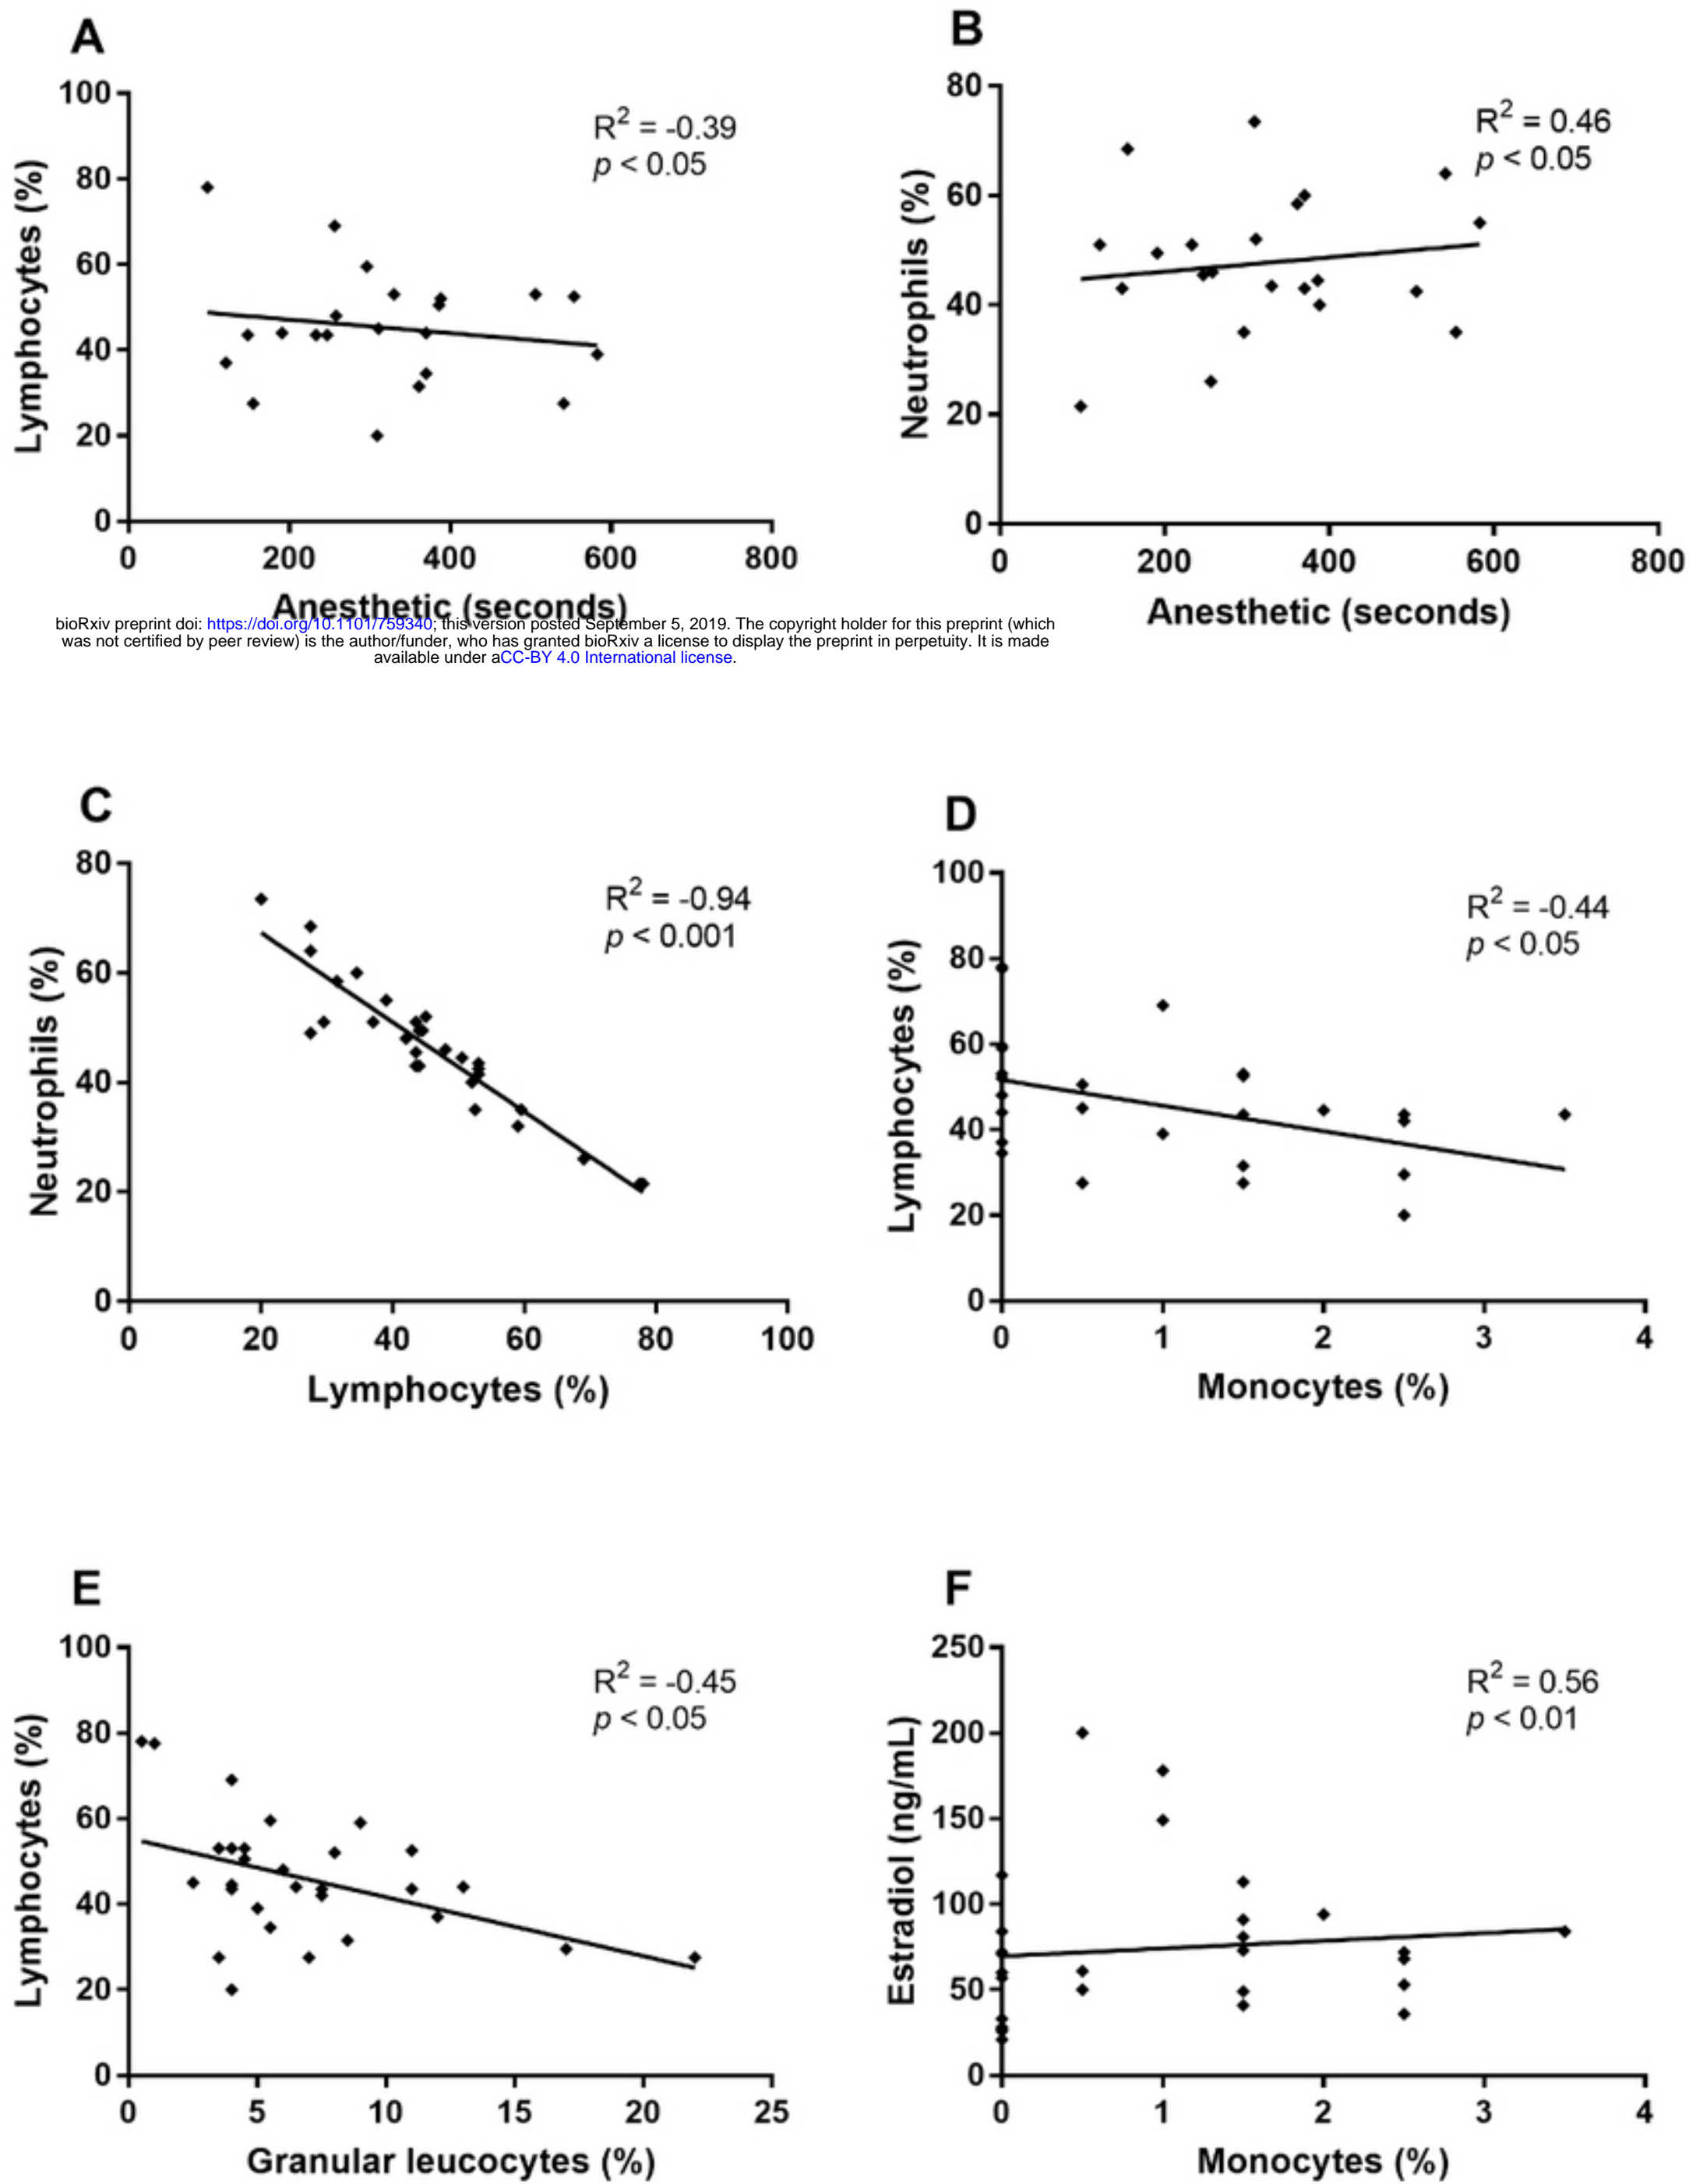

bioRxiv preprint doi: <https://doi.org/10.1101/759340>; this version posted September 5, 2019. The copyright holder for this preprint (which was not certified by peer review) is the author/funder, who has granted bioRxiv a license to display the preprint in perpetuity. It is made available under aCC-BY 4.0 International license.

Figure 6
